# Supplementary material for: Molecular dynamics simulation of Keggin HPA doped Nafion® 117 as a polymer electrolyte membrane
Source: Royal Society of Chemistry journal article supplement (doi:10.1039/c7ra05929a), 2017-01-01
Supplement: c7ra05929a1.pdf [file c7ra05929a1.pdf]

## Molecular dynamics simulation of Keggin HPA doped Nafion<sup>®</sup> 117 as polymer electrolyte membrane

S. Akbari<sup>a</sup>, M. T. Hamed Mosavian<sup>a</sup>, F. Moosavi<sup>b</sup> and A. Ahmadpour<sup>a</sup>

<sup>a</sup>Chemical Engineering Department, Faculty of Engineering, Ferdowsi University of Mashhad, Iran

<sup>b</sup>Department of Chemistry, Faculty of Science, Ferdowsi University of Mashhad, Iran

### Supporting Information

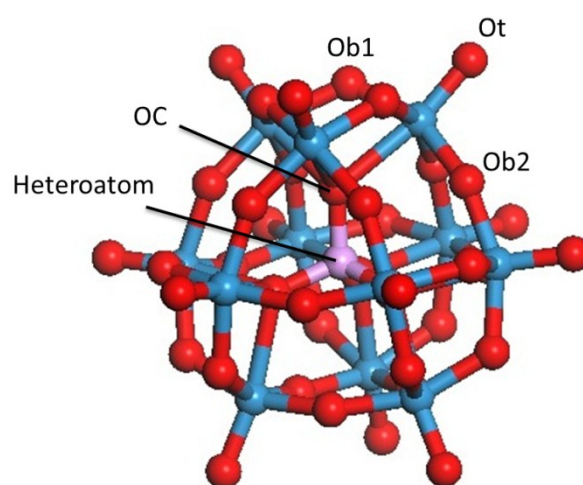

**Fig. S1.** The  $\alpha$ -Keggin anion. Oxygen (red), Tungsten (blue), Phosphorus (purple).

**Table S1.** Partial charges for HPA anions ( $\text{PW}_{12}\text{O}_{40}^{3-}$ ,  $\text{SiW}_{12}\text{O}_{40}^{4-}$  and  $\text{AlW}_{12}\text{O}_{40}^{5-}$ ) obtained from ChelpG method.

| Atom                  | $\text{PW}_{12}\text{O}_{40}^{3-}$ | $\text{SiW}_{12}\text{O}_{40}^{4-}$ | $\text{AlW}_{12}\text{O}_{40}^{5-}$ |
|-----------------------|------------------------------------|-------------------------------------|-------------------------------------|
| Heteroatom(P, Si, Al) | +1.51                              | +3.02                               | +2.96                               |
| W                     | +3.81                              | +4.09                               | +4.26                               |
| OC                    | -1.25                              | -1.97                               | -2.20                               |
| Ob1                   | -1.37                              | -1.44                               | -1.47                               |
| Ob2                   | -1.55                              | -1.65                               | -1.72                               |
| Ot                    | -0.85                              | -0.93                               | -1.00                               |

**Table S2.** Summary of simulation condition for  $\lambda=5$ . For each hydration total no. of water molecules

can be obtain from  $n_{H_2O} = n_{SO_3^-} \times \lambda - n_{H_3O^+}$ .

| $\lambda$                     | Undoped system | PW <sup>3-</sup> doped system | SiW <sup>4-</sup> doped sysytem | AlW <sup>5-</sup> doped system |
|-------------------------------|----------------|-------------------------------|---------------------------------|--------------------------------|
| chain                         | 40             | 40                            | 40                              | 40                             |
| H <sub>2</sub> O              | 1600           | 1507                          | 1476                            | 1445                           |
| POM                           | 0              | 31                            | 31                              | 31                             |
| H <sub>3</sub> O <sup>+</sup> | 400            | 493                           | 524                             | 555                            |
| total                         | 33680          | 35416                         | 35447                           | 35478                          |

In order to compare the results of density, the experimental correlation with  $\lambda$  proposed by Morris and Sun<sup>1</sup> was applied. They have reported the following equation to estimate experimental density for membrane EW=1148.

$$\rho\left(\frac{\text{g}}{\text{cm}^3}\right) = \frac{63.7 + \lambda}{31.1 + \lambda}$$

Fig. S2 shows both the calculated density and the experiment data. For undoped systems, our results are in good agreement with experimental density and the study of Mabuchi et al.<sup>2</sup>. Note that we used same annealing procedure with Mabuchi et al.<sup>1</sup>.

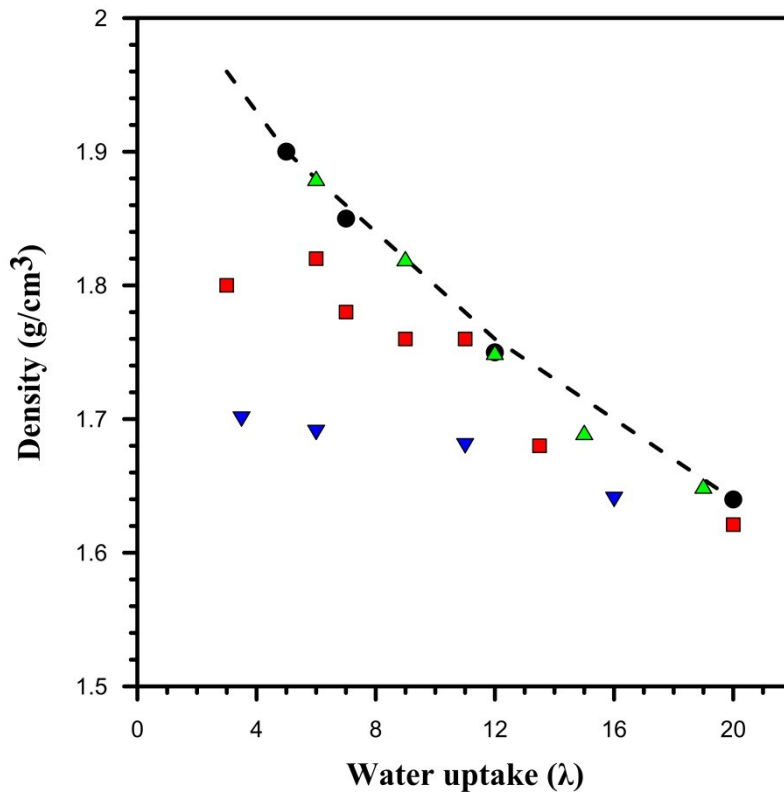

**Fig. S2.** The Simulated density of hydrated PFSA membranes as a function of hydration level ( $\lambda$ ). (--) experimental data<sup>1</sup> (●) Our simulation (▲) Mabuchi *et al.*<sup>2</sup> (▼) Venkatnathan *et al.*<sup>3</sup> (■) Devanathan *et al.*<sup>4</sup>.

**Table S3.** Final calculated density (g/cm<sup>3</sup>) and corresponding cubic box length (Å) at different hydration levels.

| $\lambda$ | Undoped system | PW <sup>3-</sup> doped system | SiW <sup>4-</sup> doped system | AlW <sup>5-</sup> doped system |
|-----------|----------------|-------------------------------|--------------------------------|--------------------------------|
| 5         | 1.90 (78.06)   | 1.92 (79.13)                  | 19.1 (78.86)                   | 1.92 (78.86)                   |
| 7         | 1.85 (78.97)   | 1.88 (79.09)                  | 1.88 (79.00)                   | 1.89 (79.20)                   |
| 12        | 1.75 (81.00)   | 1.77 (83.02)                  | 1.76 (82.50)                   | 1.76 (82.31)                   |
| 20        | 1.64 (83.88)   | 1.65 (85.00)                  | 1.65 (84.79)                   | 1.65 (84.60)                   |

**Table S4.** Percentage of hydronium ions, which locate at outside the first solvation shell of side chains (Averaged from 20000 collected trajectories).

| $\lambda$ | Undoped system | PW <sup>3-</sup> doped system | SiW <sup>4-</sup> doped system | AlW <sup>5-</sup> doped system |
|-----------|----------------|-------------------------------|--------------------------------|--------------------------------|
| 5         | 12.22          | 17.12                         | 18.06                          | 20.14                          |
| 7         | 15.02          | 20.49                         | 21.09                          | 21.62                          |
| 12        | 22.57          | 27.11                         | 29.49                          | 30.32                          |
| 20        | 28.41          | 33.78                         | 34.50                          | 35.62                          |

## Mean residence time

To investigate the dynamic behavior of H<sub>2</sub>O molecules around SO<sub>3</sub> groups, the mean residence time (MRT) of H<sub>2</sub>O molecules in vicinity of side chains were calculated. In according to the study of Brunne *et al.*<sup>5</sup>, the following time correlation function was used to evaluate MRT from all collected trajectories:

$$\tau(t_k) = \sum_{j=1}^{M-k} \sum_{i=1}^N u_i(t_j) u_i(t_j + t_k)$$

where the  $u_{ij}$  is a Boolean variable that possesses a value of 1 if the  $i$ th oxygen of H<sub>2</sub>O is within a distance 4.34 Å at time  $t$  and 0 otherwise. Finally, the MRT values obtain using fitting  $\tau(t_k)$  with an exponential function,  $A \exp(-t/\text{MRT})$ .

The MRT of water molecules in first solvation shell of sulfur atom was represented in Fig. S2 for undoped and HPA doped Nafion<sup>®</sup>. Our simulation revealed that the MRT values for HPA doped systems were lower than that of undoped systems. Among the considered dopants, the least-charged anions, PW<sup>3-</sup> shows lowest MRT and the highest MRT value achieve for the most-charged anion, AlW<sup>5-</sup>. In other word, the MRT of water molecules in first solvation shell of sulfur decreases when the charge of anions increases. It should be mentioned that the HPA particles do not decrease the MRT values at  $\lambda \geq 12$ .

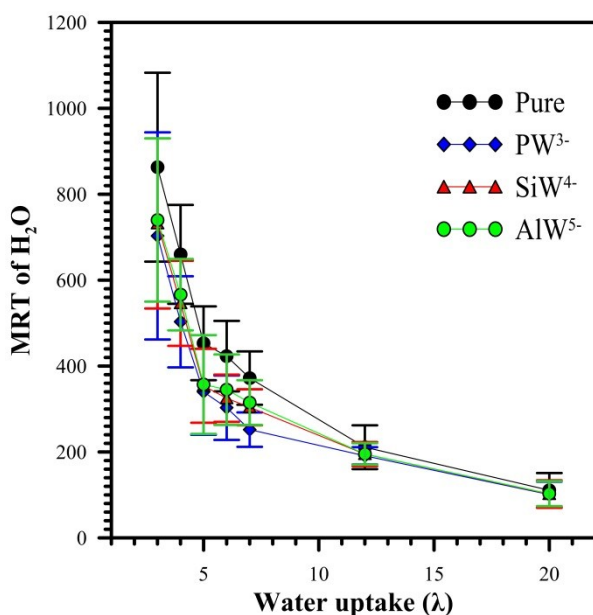

**Fig. S3** Variation of mean residence time (MRT) of H<sub>2</sub>O molecules with hydration level in undoped and HPA doped Nafion<sup>®</sup>.

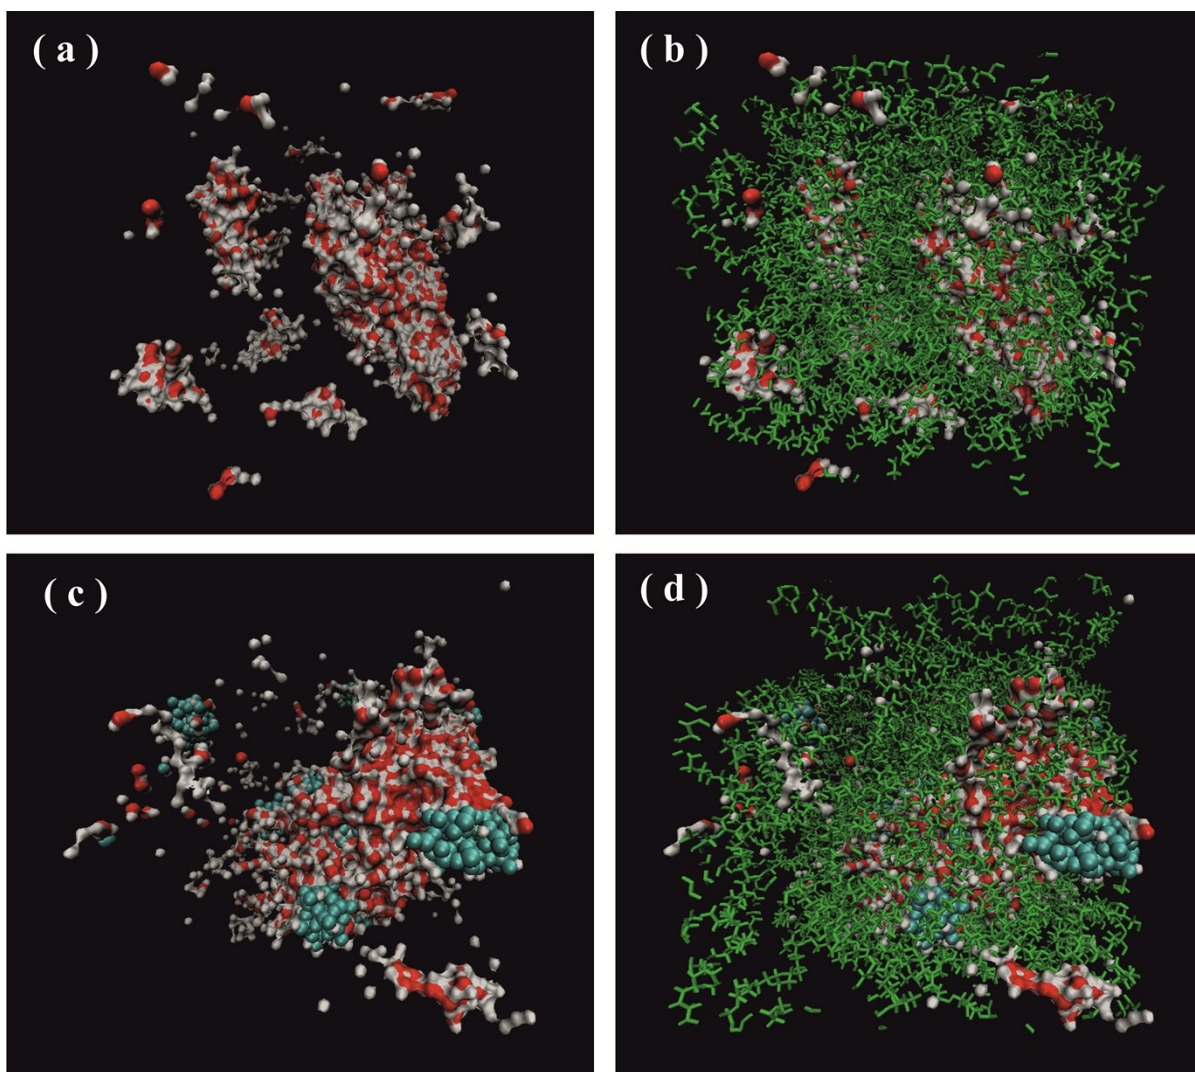

**Fig. S4** Final snapshots of  $\text{PW}^{3-}/\text{Nafion}^\circ$  membranes for  $\lambda=5$  obtained at the end of production phase MD simulations. (a) and (b) undoped  $\text{Nafion}^\circ$ , (c) and (d) HPA doped  $\text{Nafion}^\circ$ .

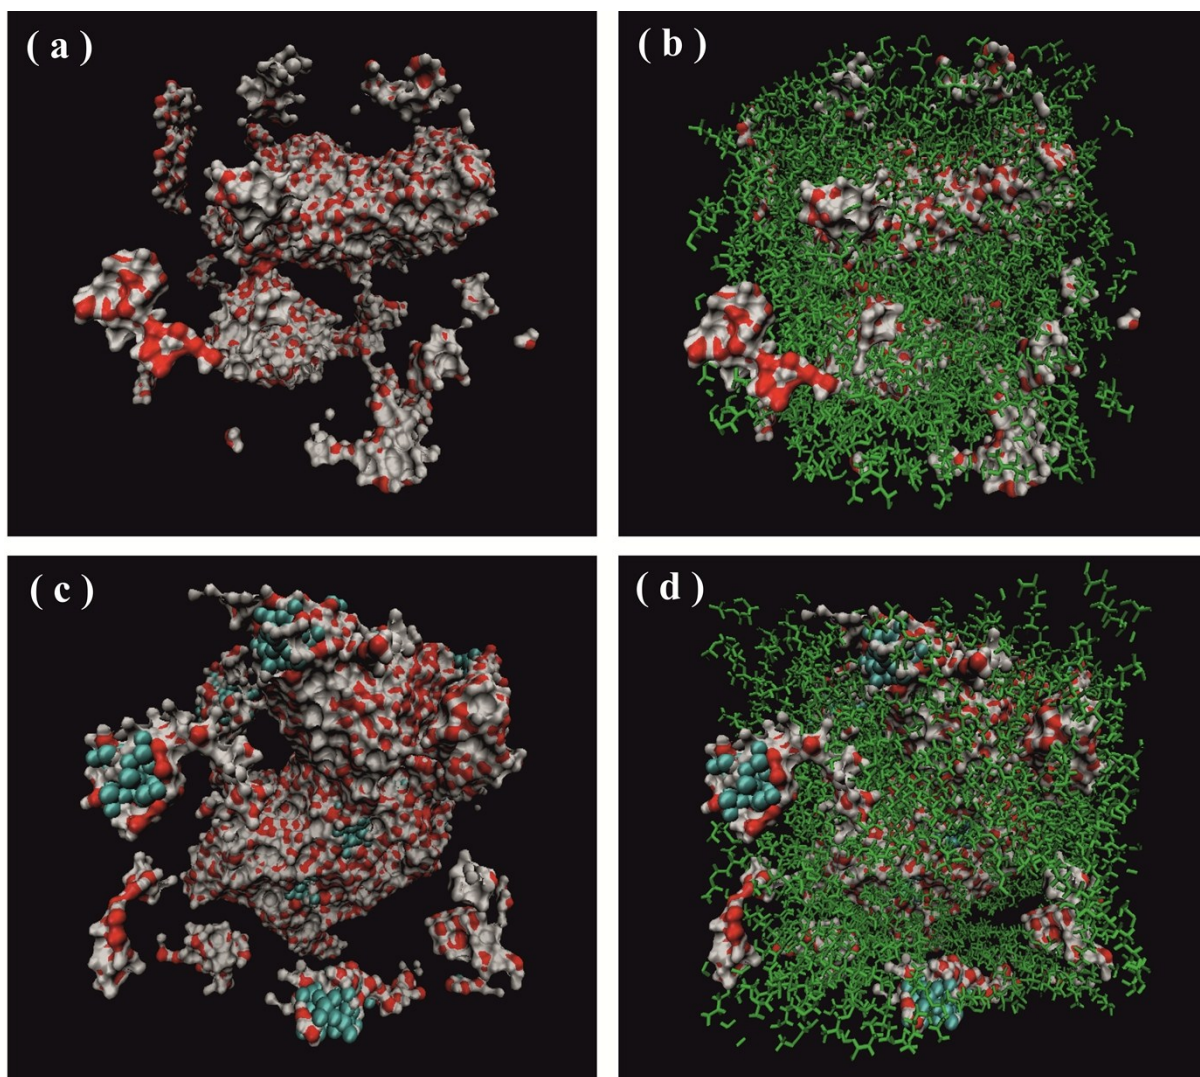

**Fig. S5** Final snapshots of  $\text{PW}^{3-}/\text{Nafion}^\circ$  membranes for  $\lambda=12$  obtained at the end of production phase MD simulations. (a) and (b) undoped  $\text{Nafion}^\circ$ , (c) and (d) HPA doped  $\text{Nafion}^\circ$ .

**Table S5.** Diffusion coefficients of hydronium ions in HPA/Nafion composite membrane obtained from a 2 ns production run.

| Dopants           | Temp. (K) | D ( $\times 10^{-6} \text{ cm}^2 \text{ s}^{-1}$ ) |             |              |              |
|-------------------|-----------|----------------------------------------------------|-------------|--------------|--------------|
|                   |           | $\lambda=5$                                        | $\lambda=7$ | $\lambda=12$ | $\lambda=20$ |
| PW <sup>3-</sup>  | 300       | 0.880                                              | 1.480       | 2.120        | 2.790        |
|                   | 320       | 1.320                                              | 2.249       | 2.968        | 7.158        |
|                   | 340       | 2.508                                              | 3.922       | 5.300        | 9.891        |
|                   | 380       | 4.532                                              | 7.104       | 8.353        | 11.021       |
| SiW <sup>4-</sup> | 300       | 0.940                                              | 1.530       | 2.170        | 2.910        |
|                   | 320       | 1.607                                              | 2.546       | 3.103        | 9.748        |
|                   | 340       | 2.858                                              | 4.054       | 5.382        | 8.148        |
|                   | 380       | 4.700                                              | 6.808       | 7.992        | 12.891       |
| AlW <sup>5-</sup> | 300       | 1.020                                              | 1.610       | 2.280        | 3.140        |
|                   | 320       | 1.754                                              | 2.695       | 3.397        | 11.744       |
|                   | 340       | 2.978                                              | 4.291       | 5.632        | 12.403       |
|                   | 380       | 4.916                                              | 7.406       | 7.980        | 13.188       |

**Table S6.** Diffusion coefficients of water molecules in HPA/Nafion composite membrane obtained from a 2 ns production run.

| Dopants           | Temp. (K) | D ( $\times 10^{-6} \text{ cm}^2 \text{ s}^{-1}$ ) |             |              |              |
|-------------------|-----------|----------------------------------------------------|-------------|--------------|--------------|
|                   |           | $\lambda=5$                                        | $\lambda=7$ | $\lambda=12$ | $\lambda=20$ |
| PW <sup>3-</sup>  | 300       | 1.090                                              | 2.600       | 4.260        | 5.370        |
|                   | 320       | 1.864                                              | 4.269       | 6.347        | 8.893        |
|                   | 340       | 2.889                                              | 7.167       | 11.502       | 11.841       |
|                   | 380       | 5.592                                              | 12.220      | 17.040       | 19.547       |
| SiW <sup>4-</sup> | 300       | 1.409                                              | 2.880       | 4.316        | 5.590        |
|                   | 320       | 2.369                                              | 4.793       | 6.172        | 9.447        |
|                   | 340       | 3.382                                              | 7.632       | 11.567       | 11.739       |
|                   | 380       | 6.904                                              | 12.816      | 16.530       | 19.118       |
| AlW <sup>5-</sup> | 300       | 1.760                                              | 3.033       | 4.480        | 5.900        |
|                   | 320       | 2.746                                              | 4.451       | 6.272        | 8.555        |
|                   | 340       | 3.820                                              | 7.572       | 11.066       | 11.210       |
|                   | 380       | 8.008                                              | 12.132      | 16.307       | 18.290       |

## References

- 1 D. R. Morris, X. Sun. Journal of Applied Polymer Science, 1993, 50, 1445-1452.
- 2 T. Mabuchi, T. Tokumasu. The Journal of Chemical Physics, 2014, 141, 104904.
- 3 A. Venkatnathan, R. Devanathan, and M. Dupuis, The Journal of Chemical Physics B, 2007, 111, 7234.
- 4 R. Devanathan, A. Venkatnathan, and M. Dupuis, The Journal of Chemical Physics B, 2007, 111, 8069.
- 5 R. Brunne, E. Liepinsh, G. Otting, K. Wüthrich, W. Van Gunsteren, Journal of Molecular Biology, 1993, 231, 1040-1048.
